# Supplementary material for: The salivary proteome profile in patients affected by SAPHO syndrome characterized by a top-down RP-HPLC-ESI-MS platform
Source: Royal Society of Chemistry journal article supplement (doi:10.1039/c4mb00719k), 2015-02-02
Supplement: c4mb00719k1.pdf [file c4mb00719k1.pdf]

**Table S1.** Swiss-Prot code, experimental and theoretical average mass values and elution times of proteins and peptides investigated not showing level variation in the two groups.

| Proteins                         | Swiss-Prot code | Experimental av mass<br>(Theoretical av mass) | Elution time<br>(min) |
|----------------------------------|-----------------|-----------------------------------------------|-----------------------|
| Cystatin B-SS <sup>a</sup> dimer | P04080          | 22362 ± 3 (22361.2)                           | 33.6-34.4             |
| Cystatin B-SSG <sup>b</sup>      |                 | 11487 ± 2 (11486.7)                           | 32.5-33.1             |
| Cystatin C                       | P01034          | 13343 ± 2 (13343.1)                           | 38.2-38.9             |
| Cystatin C-Mox <sup>c</sup>      |                 | 13360 ± 2 (13359.1)                           | 38.1-38.7             |
| Cystatin B-SS <sup>a</sup> dimer | P04080          | 22362 ± 3 (22361.2)                           | 33.6-34.4             |
| Thymosin β <sub>4</sub>          | P62328          | 4962.5 ± 0.4 (4963.5)                         | 20.7-21.0             |
| Thymosin β <sub>4</sub> -Mox     |                 | 4979.4 ± 0.4 (4979.5)                         | 19.0-19.2             |
| Thymosin β <sub>10</sub>         | P63313          | 4936.3 ± 0.4 (4936.5)                         | 22.0-22.4             |
| Statherin diphos                 | P02808          | 5380.0 ± 0.5 (5379.7)                         | 28.9-29.5             |
| α-defensin 1                     | P59665          | 3442.1 ± 0.4 (3442.1)                         | 24.9-25.4             |
| α-defensin 2                     | P59665/P59666   | 3371.0 ± 0.4 (3371.0)                         | 24.9-25.4             |
| α-defensin 3                     | P59666          | 3486.1 ± 0.4 (3486.1)                         | 24.9-25.4             |
| α-defensin 4                     | P12838          | 3709.3 ± 0.4 (3709.5)                         | 27.7-28.0             |
| S100A8                           | P05109          | 10833 ± 2 (10834.5)                           | 39.1-39.7             |
| S100A9 short                     | P06702          | 12690 ± 2 (12689.2)                           | 41.3-42.0             |
| S100A9 short monophos            |                 | 12770 ± 2 (12769.2)                           | 41.3-42.0             |
| S100A9 short-Mox                 |                 | 12706 ± 2 (12705.2)                           | 41.3-42.0             |
| S100A9 short-Mox monophos        |                 | 12786 ± 2 (12785.2)                           | 41.3-42.0             |
| S100A9 long-SSG                  |                 | 13459 ± 2 (13458.1)                           | 41.1-41.8             |
| S100A9 long-SSG monophos         |                 | 13539 ± 2 (13538.1)                           | 41.1-41.8             |
| S100A9 long-SCyst                |                 | 13273 ± 2 (13271.9)                           | 41.1-41.8             |
| S100A9 long-SCyst monophos       |                 | 13353 ± 2 (13351.9)                           | 41.1-41.8             |
| S100A7 (D27) <sup>d</sup>        | P31151          | 11367 ± 2 (11367.8)                           | 37.4-38.0             |

<sup>a</sup>SS: disulfide bridge. <sup>b</sup>SSG: glutathionylated cysteine residue. <sup>c</sup>M-ox: methionine sulfoxide. <sup>d</sup> The Swiss-Prot code refers to the variant E27.
